# Supplementary material for: Accelerating carrier separation to boost the photocatalytic CO 2 reduction performance of ternary heterojunction Ag–Ti 3 C 2 T x /ZnO catalysts
Source: Royal Society of Chemistry journal article supplement (doi:10.1039/d4ra01985g), 2024-01-01
Supplement: d4ra01985g1.pdf [file d4ra01985g1.pdf]

## Supporting information

### Supplemental figures

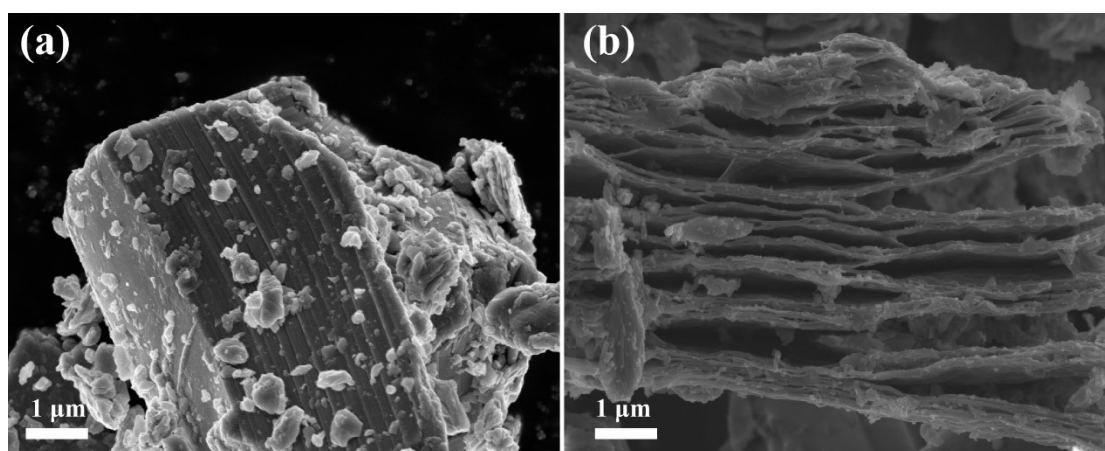

Fig. S1 SEM images of (a) Ti<sub>3</sub>AlC<sub>2</sub> and (b) MX.

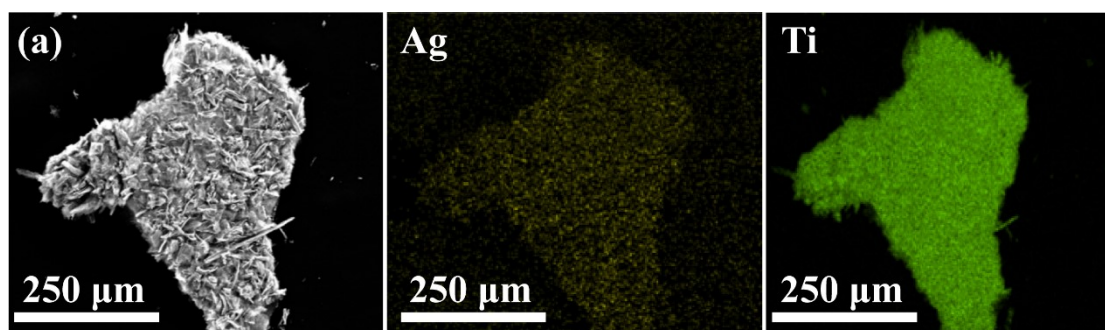

Fig. S2. SEM-EDS-Mapping images of Ag and Ti elements over AT sample.

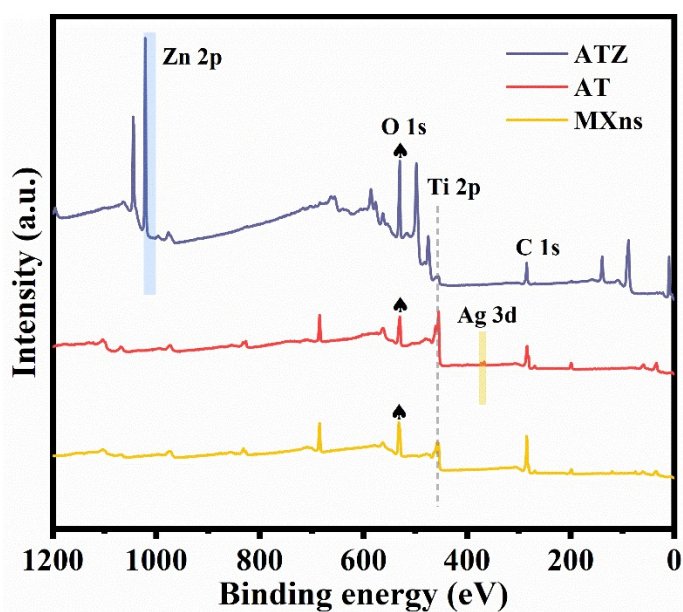

Fig. S3. XPS full spectra of the MXns, ZnO, and ATZ

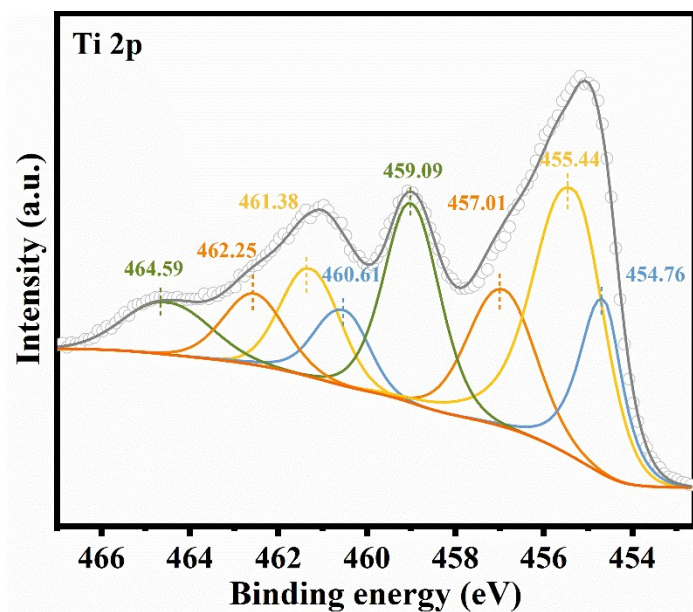

Fig. S4. XPS spectra of Ti 2p for AT.

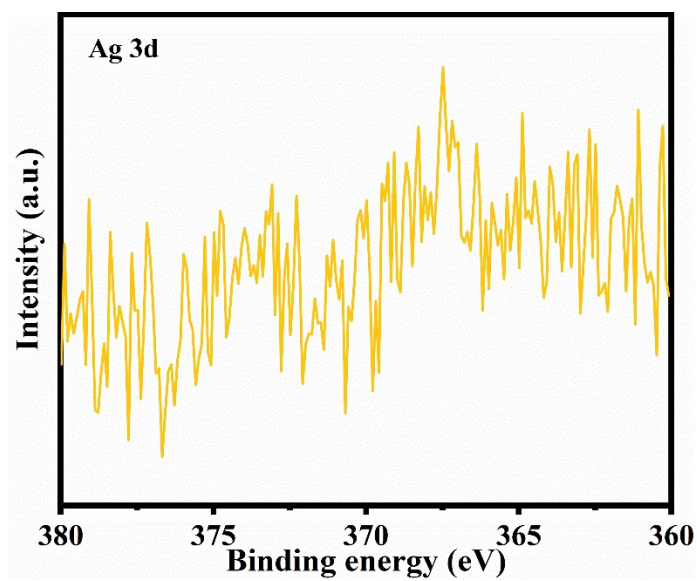

Fig. S5. XPS spectra of Ag 3d for 1ATZ.

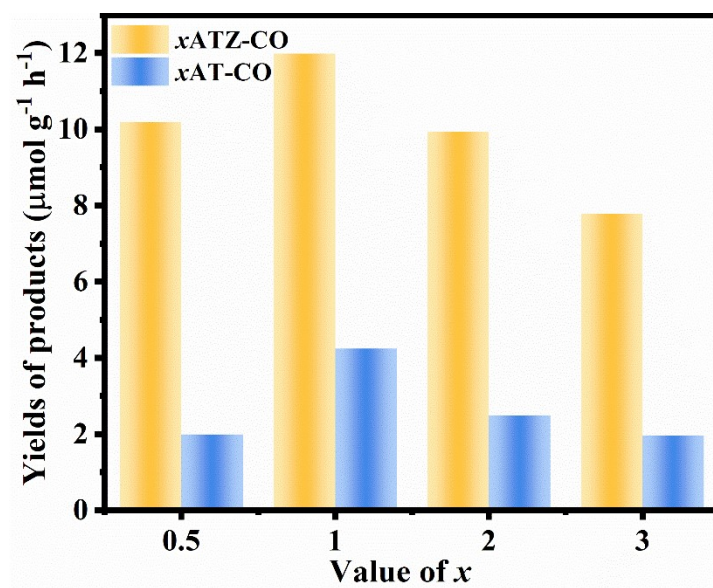

Fig. S6. CO yield plots of xAT and xATZ.

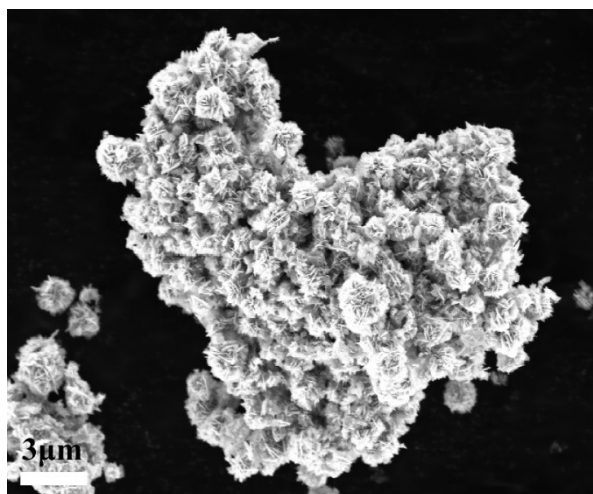

Fig. S7. SEM images of 2ATZ.

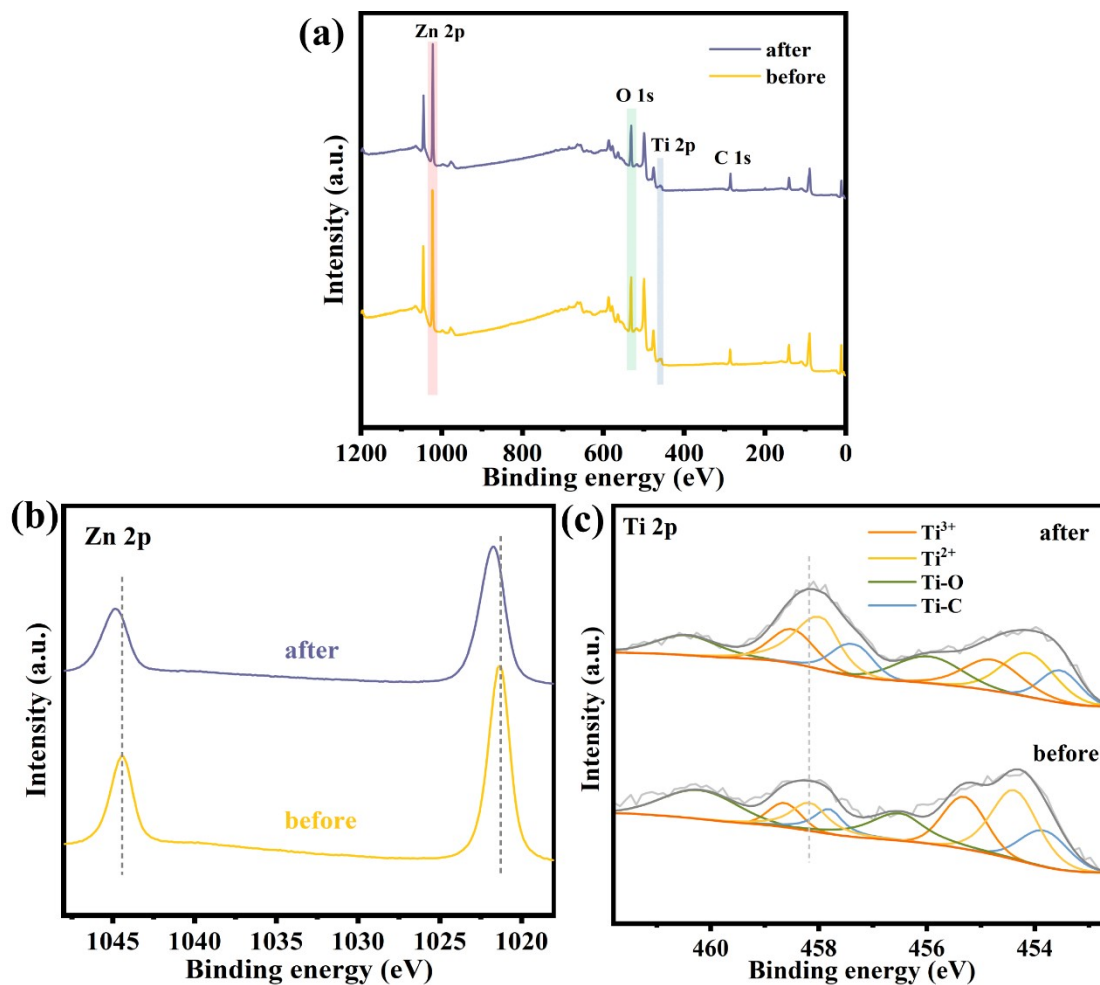

Fig. S8. XPS spectra of (a) full spectra (b) Zn 2p (c) Ti 2p for 1ATZ before and after use.

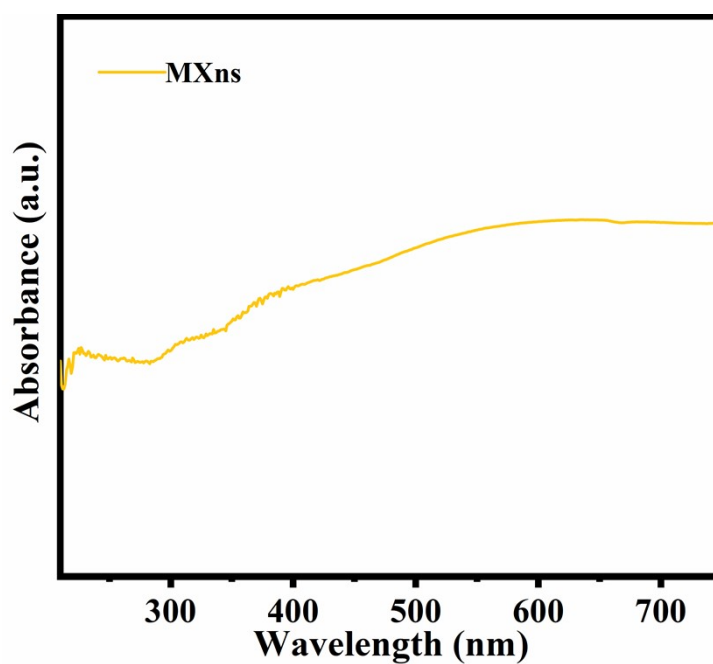

Fig. S9. UV-vis absorption spectra of MXNs.

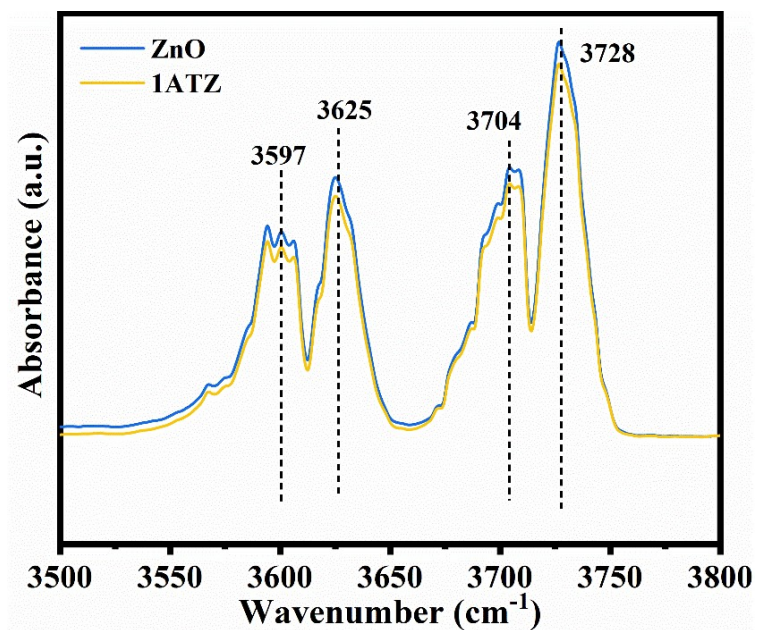

Fig. S10. In-situ DRIFTS spectra of CO<sub>2</sub> adsorption on 1ATZ and ZnO in the presence of CO<sub>2</sub>/H<sub>2</sub>O for 5 min in the dark.

Table S1. Specific surface area and pore size of the samples

| Samples | Specific surface area (SSA) (m <sup>2</sup> ·g <sup>-1</sup> ) | Pore size (nm) | Pore volume (cm <sup>3</sup> ·g <sup>-1</sup> ) |
|---------|----------------------------------------------------------------|----------------|-------------------------------------------------|
| ZnO     | 91.794                                                         | 7.304          | 0.212                                           |
| MXns    | 81.557                                                         | 4.573          | 0.083                                           |
| 1ATZ    | 153.298                                                        | 7.275          | 0.299                                           |

|                                                                                                                                                                                                                                                                                                                                         |         |        |        |            |
|-----------------------------------------------------------------------------------------------------------------------------------------------------------------------------------------------------------------------------------------------------------------------------------------------------------------------------------------|---------|--------|--------|------------|
| [1] C. Yang, Q. Tan, Q. Li, <i>et al.</i> , 2D/2D Ti <sub>3</sub> C <sub>2</sub> MXene/g-C <sub>3</sub> N <sub>4</sub> nanosheets heterojunction for high efficient CO <sub>2</sub> reduction photocatalyst: Dual effects of urea, <i>Appl. Catal. B-Environ.</i> , 268 (2020) 118738.                                                  |         |        |        |            |
| [2] Q. Tang, Z. Sun, S. Deng, <i>et al.</i> , Decorating g-C <sub>3</sub> N <sub>4</sub> with alkalized Ti <sub>3</sub> C <sub>2</sub> MXene for promoted photocatalytic CO <sub>2</sub> production performance, <i>Journal of Colloid and Interface Science</i> , 564 (2020) 406-417.                                                  |         |        |        | references |
| [3] W.Z. Liu, M.X. Sun, Z.P. Ding, <i>et al.</i> , Ti <sub>3</sub> C <sub>2</sub> MXene embellished g-C <sub>3</sub> N <sub>4</sub> nanosheets for improved 300W photocatalytic redox capacity, <i>Journal of Alloys and Compounds</i> , 877 (2021).                                                                                    | 300 W   | 5.19   | 0.04   | [1]        |
| [4] B. Yu, Y. Zhou, P. Li, <i>et al.</i> , Photocatalytic reduction of CO <sub>2</sub> over Ag/TiO <sub>2</sub> nanocomposites prepared with a simple and rapid silver mirror method, <i>Nanoscale</i> , 8 (2016) 11870-11874.                                                                                                          | 300 W   | 2.24   | 0.05   | [2]        |
| [5] F. He, B. Zhu, B. Cheng, <i>et al.</i> , 2D/2D/0D TiO <sub>2</sub> /C <sub>3</sub> N <sub>4</sub> /Ti <sub>3</sub> C <sub>2</sub> MXene composite S-scheme photocatalyst enhanced CO <sub>2</sub> reduction activity, <i>Appl. Catal. B-Environ.</i> , 272 (2020) 119006.                                                           | 300 W   | 2.67   | 0.66   | [3]        |
| [6] W.N. Shi, R. Zhang, J.C. Wang, <i>et al.</i> , One-pot hydrothermal preparation of Ni and I co-doped brookite anatase TiO <sub>2</sub> nanoparticles with remarkably enhanced photocatalytic activity of CO <sub>2</sub> to CH <sub>4</sub> , <i>Journal of Catalysis</i> , 429 (2024).                                             | 300 W   | 4.49   |        | [4]        |
| [7] T.T. Li, R. Tao, Y.X. Wang, <i>et al.</i> , Construction of bismuth oxide iodide (BiOI)/zinc titanium (Zn <sub>2</sub> TiO <sub>4</sub> ) p-n heterojunction nanofibers with abundant oxygen vacancies for improving photocatalytic carbon dioxide reduction, <i>Journal of Colloid and Interface Science</i> , 655 (2024) 841-851. | 300 W   | 4.39   | 1.20   | [5]        |
| [8] R.A. Mahmud, A. Ali, L.K. Putri, <i>et al.</i> , ZnO with engineered surface defects as a competent photocatalyst for CO <sub>2</sub> photoreduction into valuable fuels under simulated solar light irradiation, <i>Journal of Environmental Chemical Engineering</i> , 11 (2023).                                                 | 300 W   | 9.10   |        | [7]        |
| BiOI/Zn <sub>2</sub> TiO <sub>4</sub>                                                                                                                                                                                                                                                                                                   | Xe lamp |        | /      |            |
| ZnO nanoparticles                                                                                                                                                                                                                                                                                                                       | 500 W   | /      | <0.043 | [8]        |
| Ag-Ti <sub>3</sub> C <sub>2</sub> T <sub>x</sub> /ZnO                                                                                                                                                                                                                                                                                   | 300 W   | 11.985 | 0.768  | This work  |
|                                                                                                                                                                                                                                                                                                                                         | Xe lamp |        |        |            |

Table S2. Comparison of photocatalytic reduction activities of similar catalysts
